# Supplementary material for: Tough, durable and strongly bonded self-healing cartilage-mimicking noncovalently assembled hydrogel nanostructures: the interplay between experiment and theory
Source: Royal Society of Chemistry journal article supplement (doi:10.1039/d4nr03322a), 2024-11-21
Supplement: d4nr03322a1.pdf [file d4nr03322a1.pdf]

## **Supporting Information**

### **Tough, Durable and Strongly Bonded Self-Healing Cartilage-mimicking Noncovalent Assembly Hydrogel Nanostructures: The Interplay of Experiment and Theory**

Shikha Awasthi<sup>1\*</sup>, Sarvesh Kumar Pandey<sup>2\*</sup>, Hulikere Jagdish Shwetha<sup>3</sup>, Nehal<sup>1</sup> and S.  
Selvaraj<sup>4</sup>

<sup>1</sup>Department of Chemistry, School of Basic Sciences, Manipal University Jaipur, Jaipur –  
303007, Rajasthan, India

<sup>2</sup>Department of Chemistry, Maulana Azad National Institute of Technology, Bhopal-462003,  
Madhya Pradesh, India

<sup>3</sup>Department of Materials Engineering, Indian Institute of Science Bengaluru, Bengaluru -  
560012, Karnataka, India

<sup>4</sup>Department of Physics, Saveetha School of Engineering, Saveetha Institute of Medical and  
Technical Sciences, Thandalam, Chennai-602105, Tamil Nadu, India

Corresponding Authors email:

\*Shikha Awasthi: [awas.shikha2212@gmail.com](mailto:awas.shikha2212@gmail.com)

\*Sarvesh Kumar Pandey: [skpchmiitk@gmail.com](mailto:skpchmiitk@gmail.com)

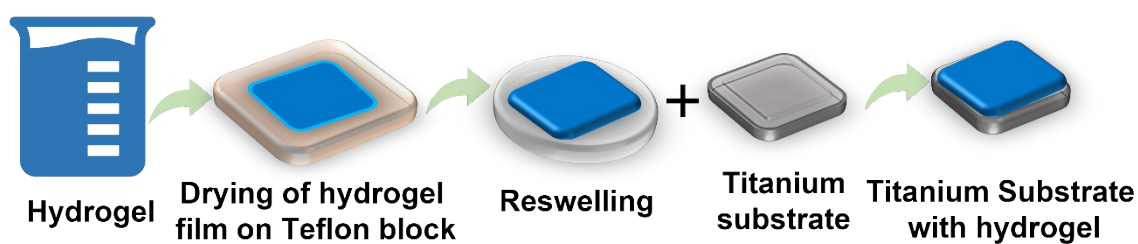

Figure S1: Preparation of hydrogel for electrochemical testing.

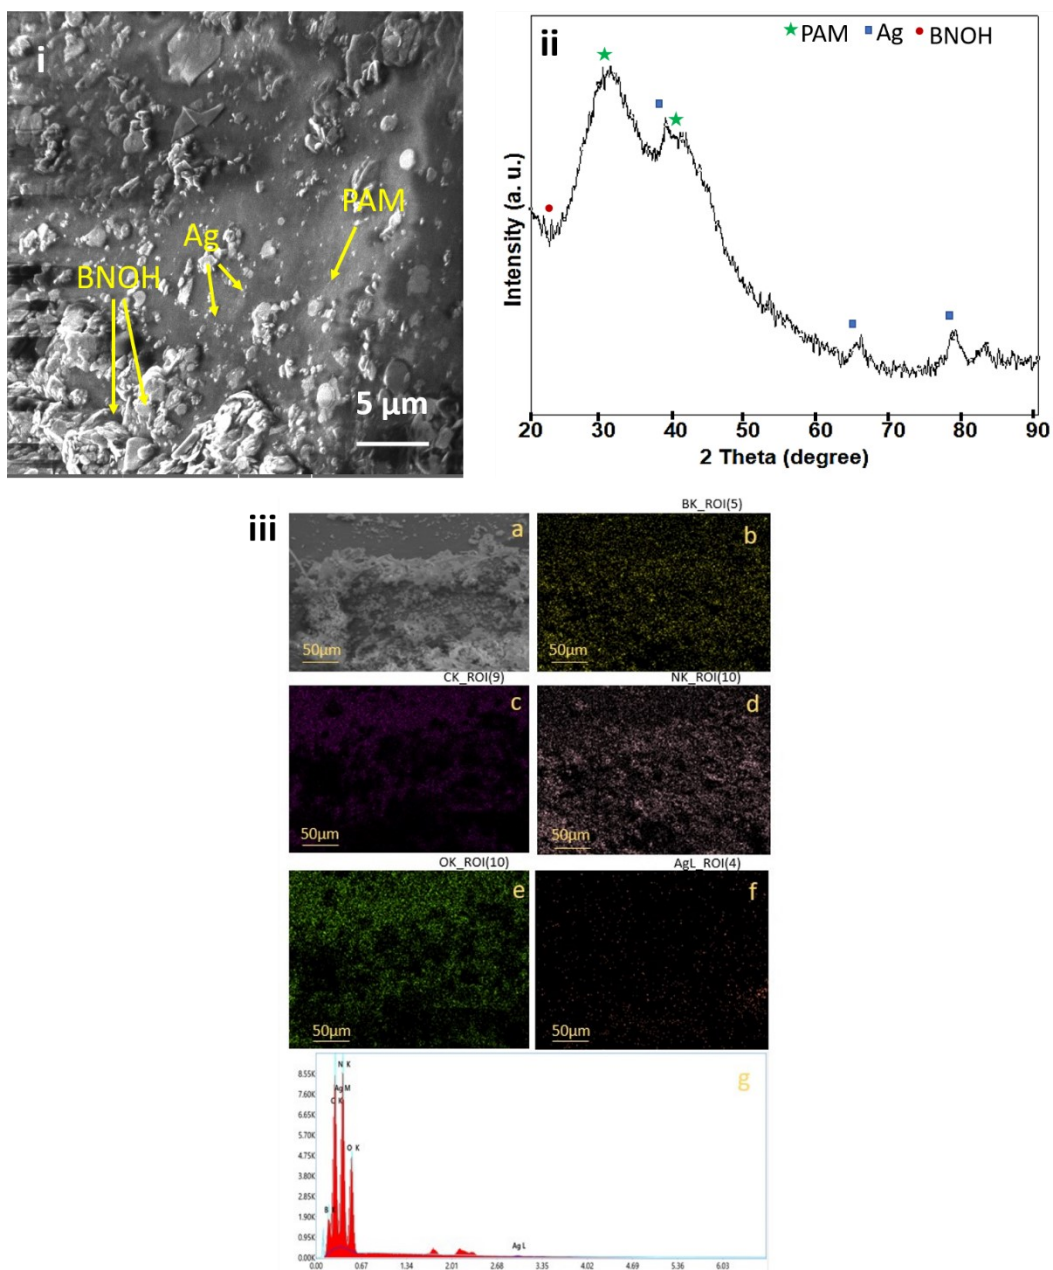

Figure S2A: (i) SEM image, (ii) XRD and (iii) Elemental mapping of PAM-Ag-BN trimer composite showing (a) surface morphology, (b) elemental B distribution, (c) elemental C

distribution, (d) elemental N distribution, (e) elemental O distribution, (f) elemental Ag distribution and (g) EDS.

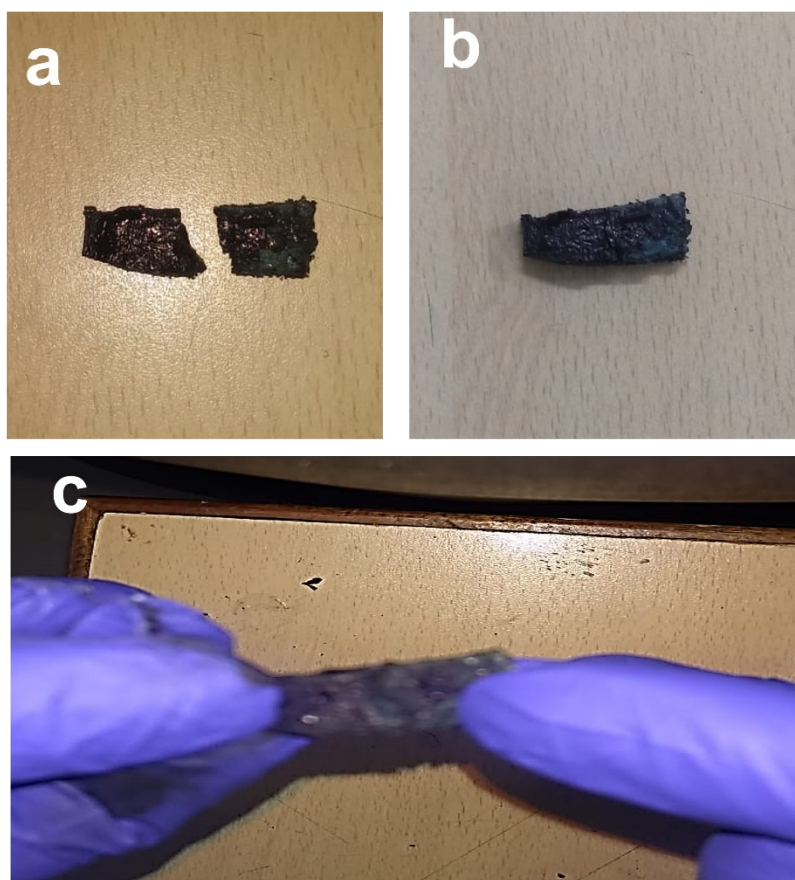

Figure S2B: Images of self-healed sample (a) two halves of PAM-Ag-BN sample, (b) Self-healing of the sample and (c) force applied on the self-healed sample, showing a significant recovery.

### Computational Study - Supporting Information (SI)

**Section S1.** A clear picture of the QTAIM molecular graphs of all the three composite models can be seen in Figures S3 (Ag), S4 (PAM), S5 (BNOH), S6 (PAM-Ag), S7 (PAM-BNOH), and S8 (PAM-Ag-BNOH) which illustrate all binding features [noncovalent (*via* conventional and NBPs) and covalent interactions] involved therein the species. *For the sake of clarity of the graphical visualization of all the MNIs (Ag-O, Ag-N, Ag-H), covalent bond (B-O), NCIs (weak to moderate to strong HBs), and extremely weak vdW interactions, monomer units, dimer and trimer complexes can be seen by viewing these through Zoom (Zoom-In Mode).*

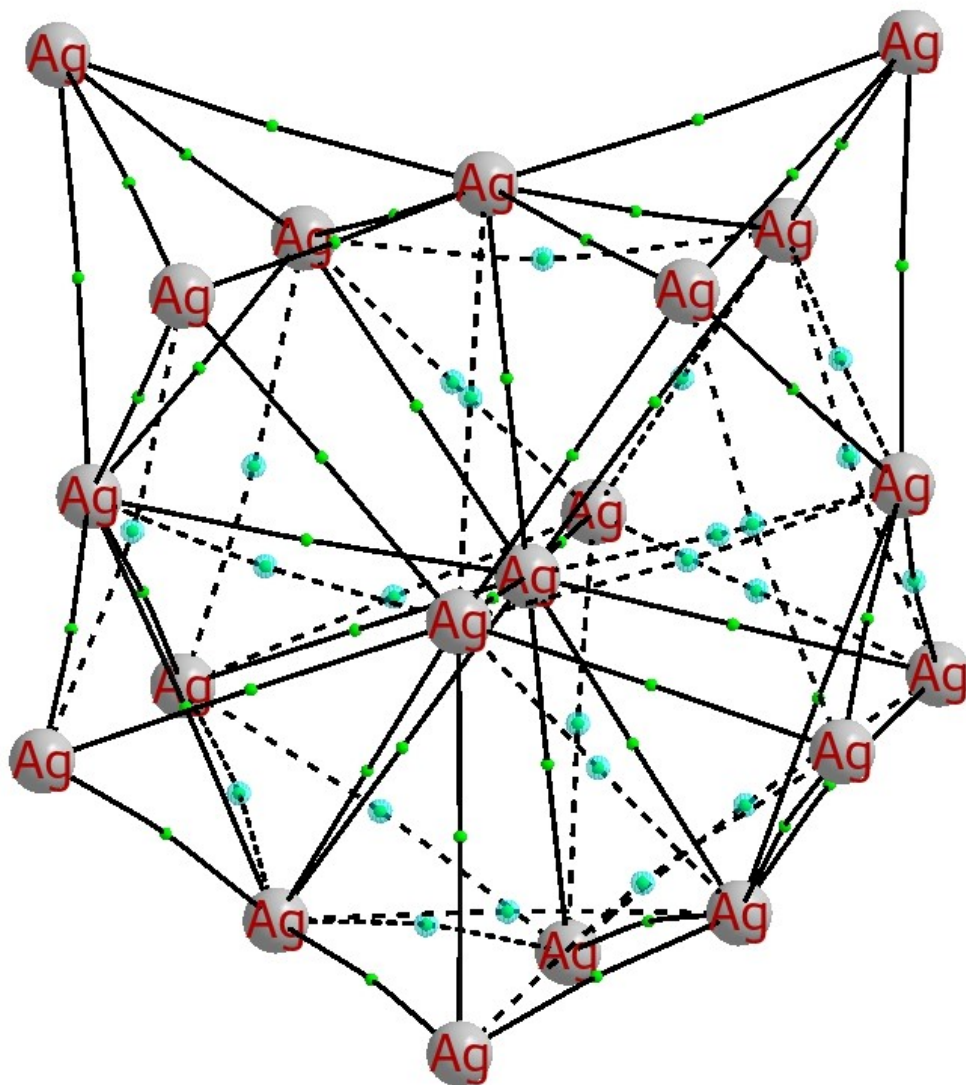

Figure S3: QTAIM-based Molecular Graph of the Ag Assembly as a Component Model.

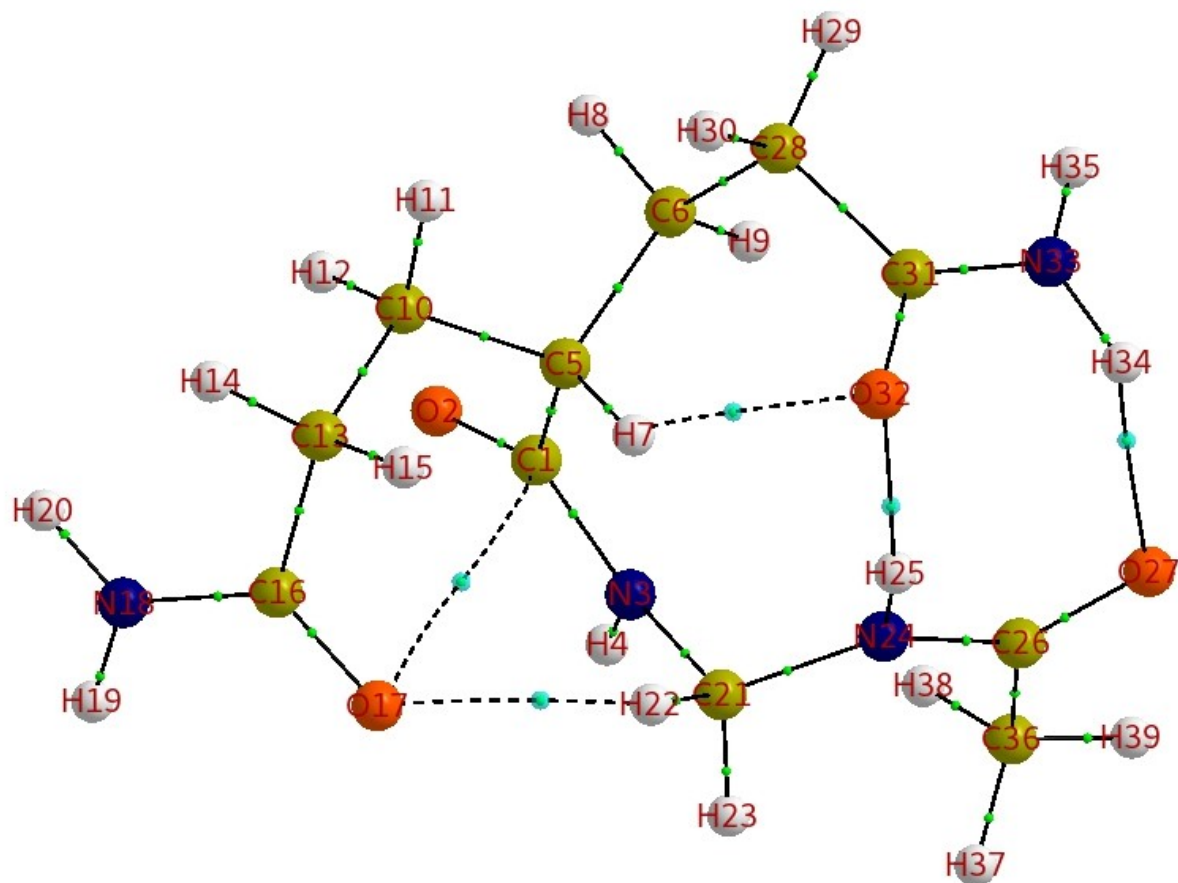

Figure S4. QTAIM-based Molecular Graph for the PAM Monomer Unit Chosen as a Model

Table S1. Some Important and Selected QTAIM-based Topological Parameters [ $\rho$ ,  $\nabla^2(\rho)$ ,  $V$ , DI (A, B)] of the PAM Parent (Monomer) Unit

| Bond                 | HBD, BPL (in Å) | $\rho$ (au) | $\nabla^2(\rho)$ (au) | $V$ (au) | DI (A, B) |
|----------------------|-----------------|-------------|-----------------------|----------|-----------|
| NCI (Intramolecular) |                 |             |                       |          |           |
| N24-H25...O32        | 1.880, 1.907    | 0.031       | +0.103                | -0.027   | 0.090     |
| N33-H34...O27        | 1.978, 2.005    | 0.026       | +0.084                | -0.022   | 0.075     |
| C21-H22...O17        | 2.278, 2.299    | 0.014       | +0.052                | -0.011   | 0.048     |

|                      |                |             |                       |          |           |
|----------------------|----------------|-------------|-----------------------|----------|-----------|
| C5-H7...O32          | 2.317, 2.339   | 0.015       | +0.049                | -0.011   | 0.050     |
| NBP (Intramolecular) |                |             |                       |          |           |
| Bond Path            | BL, BPL (in Å) | $\rho$ (au) | $\nabla^2(\rho)$ (au) | $V$ (au) | DI (A, B) |
| C1...O17             | 3.129, 3.141   | 0.007       | +0.027                | -0.005   | 0.018     |

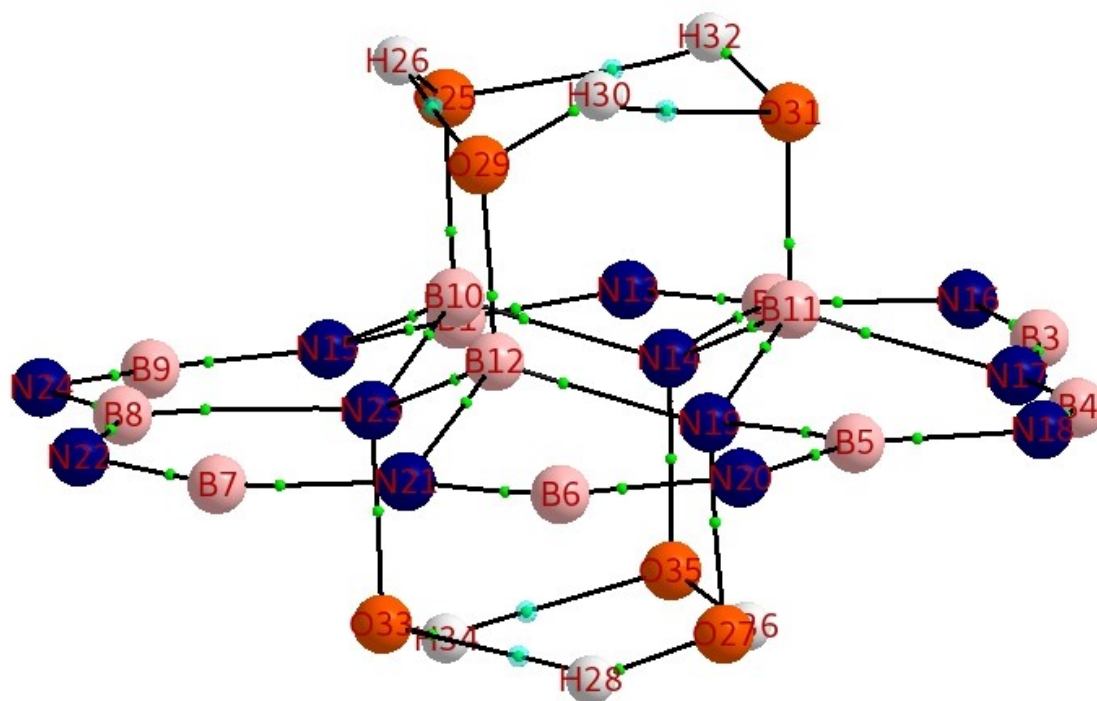

Figure S5. QTAIM-based Molecular Graph for the BNOH Monomer Unit Chosen as a Model

Table S2. Some Important and Selected QTAIM-based Topological Parameters [ $\rho$ ,  $\nabla^2(\rho)$ ,  $V$ , DI (A, B)] of the BNOH Parent (Monomer) Unit

| Bond                 | HBD, BPL (in Å) | $\rho$ (au) | $\nabla^2(\rho)$ (au) | $V$ (au) | DI (A, B) | Region          |
|----------------------|-----------------|-------------|-----------------------|----------|-----------|-----------------|
| NCI (Intramolecular) |                 |             |                       |          |           |                 |
| O35-H36...O27        | 1.806, 1.825    | 0.041       | +0.131                | -0.037   | 0.096     | N-side (bottom) |
| O27-H28...O33        | 1.810, 1.829    | 0.040       | +0.130                | -0.037   | 0.095     | N-side (bottom) |

|               |              |       |        |        |       |                 |
|---------------|--------------|-------|--------|--------|-------|-----------------|
| O33-H34...O35 | 1.811, 1.830 | 0.040 | +0.129 | -0.037 | 0.095 | N-side (bottom) |
| O25-H26...O29 | 1.992, 2.019 | 0.028 | +0.091 | -0.025 | 0.065 | B-side (top)    |
| O31-H32...O25 | 1.996, 2.023 | 0.027 | +0.090 | -0.025 | 0.065 | B-side (top)    |
| O29-H30...O31 | 2.001, 2.029 | 0.027 | +0.089 | -0.025 | 0.064 | B-side (top)    |

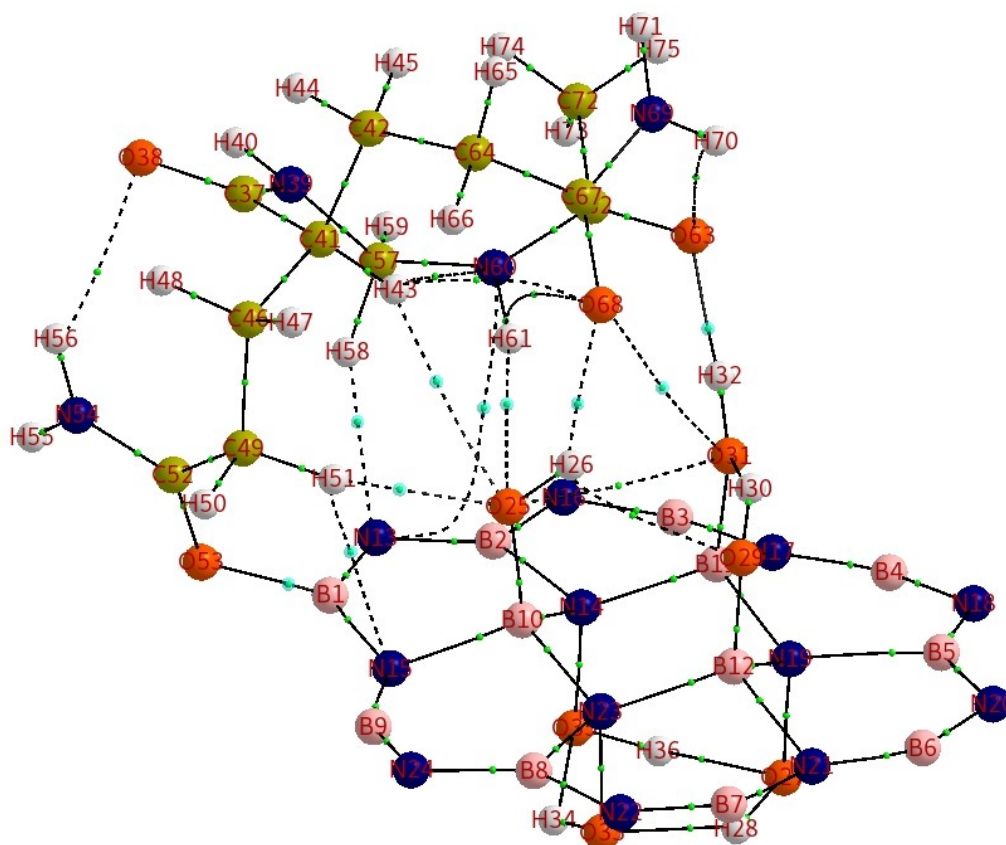

Figure S6. QTAIM-based Molecular Graph for the PAM-BNOH Composite Model

Table S3. Some Important and Selected QTAIM-based Topological Parameters [ $\rho$ ,  $\nabla^2(\rho)$ ,  $V$ ,  $DI(A, B)$ ] of the PAM-BNOH Composite Model

| Bond                                              | BL, BPL (in Å) | $\rho$ (au) | $\nabla^2(\rho)$ (au) | $V$ (au) | $DI(A, B)$ |
|---------------------------------------------------|----------------|-------------|-----------------------|----------|------------|
| Covalent bond Between the PAM and BNOH Components |                |             |                       |          |            |
| B1-O53                                            | 1.564, 1.568   | 0.107       | +0.404                | -0.213   | 0.314      |

| NCI (Intermolecular) Between the PAM and BNOH Components |                             |             |                       |          |           |
|----------------------------------------------------------|-----------------------------|-------------|-----------------------|----------|-----------|
| Bond                                                     | HBD, BPL (in Å), bond angle | $\rho$ (au) | $\nabla^2(\rho)$ (au) | $V$ (au) | DI (A, B) |
| O31-H32...O63                                            | 1.710, 1.738, 174.1°        | 0.045       | +0.148                | -0.039   | 0.115     |
| O25-H26...O68                                            | 1.924, 1.950, 136.1°        | 0.024       | +0.101                | -0.023   | 0.051     |
| C49-H51...O25                                            | 2.087, 2.105, 176.7°        | 0.022       | +0.070                | -0.019   | 0.072     |
| C41-H43...O25                                            | 2.792, 2.815, 143.8°        | 0.005       | +0.020                | -0.003   | 0.015     |
| C57-H58...N13                                            | 2.135, 2.155, 151.1         | 0.023       | +0.066                | -0.016   | 0.100     |
| C49-H51...N15                                            | 2.603, 2.634, 124.7°        | 0.010       | +0.039                | -0.007   | 0.023     |
| N60-H61...O25                                            | 2.520, 2.546, 169.3°        | 0.008       | +0.030                | -0.006   | 0.026     |
| NBP (Intermolecular) Between the PAM and BNOH Components |                             |             |                       |          |           |
| Bond Path                                                | BL, BPL (in Å)              | $\rho$ (au) | $\nabla^2(\rho)$ (au) | $V$ (au) | DI (A, B) |
| O68 – O31                                                | 3.187, 3.202                | 0.005       | +0.023                | -0.004   | 0.021     |
| N60 – N13                                                | 3.401, 4.002                | 0.007       | +0.023                | -0.004   | 0.017     |



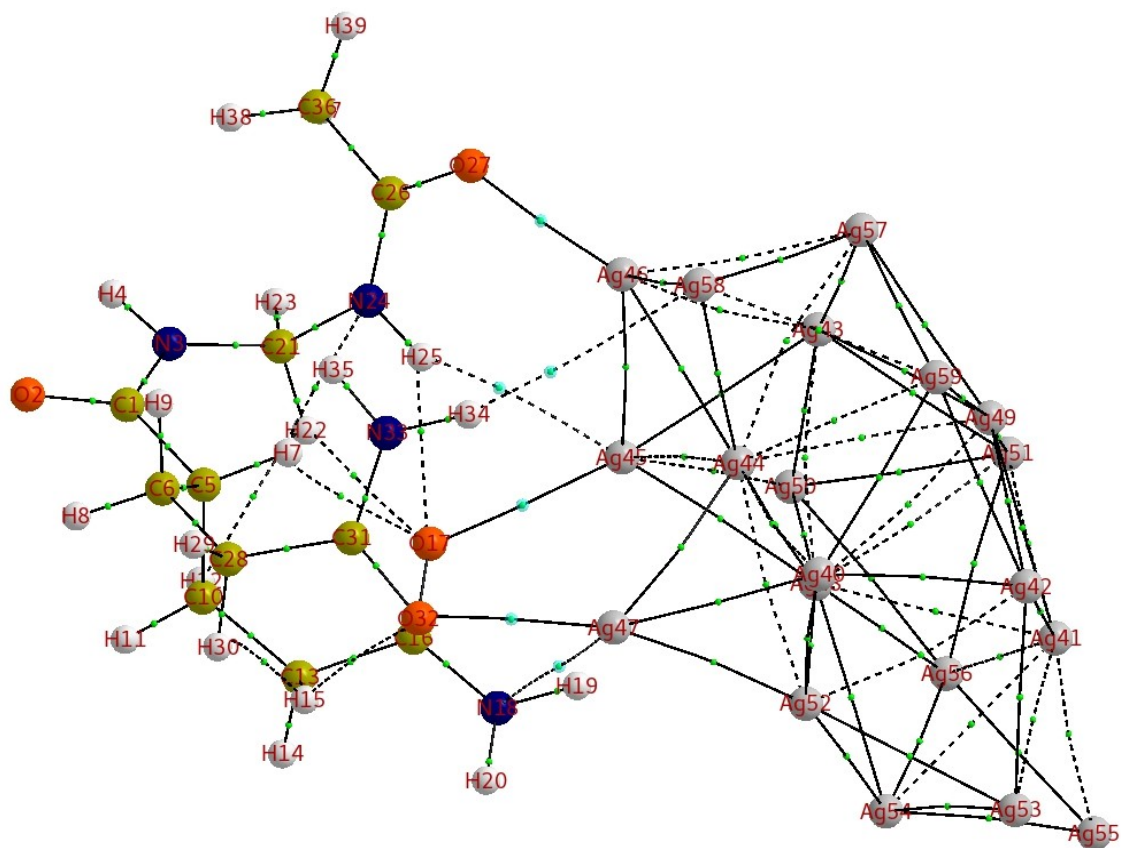

Figure S7. QTAIM-based Molecular Graph for the PAM-Ag Composite Model

Table S4. Some Important and Selected QTAIM-based Topological Parameters [ $\rho$ ,  $\nabla^2(\rho)$ ,  $V$ ,  $DI(A, B)$ ] of the PAM-Ag Composite Model

| Bond                                                            | BL, BPL (in Å) | $\rho$ (au) | $\nabla^2(\rho)$ (au) | $V$ (au) | $DI(A, B)$ |
|-----------------------------------------------------------------|----------------|-------------|-----------------------|----------|------------|
| MNI (Intermolecular) Between the PAM and Ag Assembly Components |                |             |                       |          |            |
| Ag47-O32                                                        | 2.362, 2.365   | 0.043       | +0.227                | -0.055   | 0.301      |
| Ag46-O27                                                        | 2.411, 2.415   | 0.039       | +0.197                | -0.047   | 0.283      |
| Ag45-O17                                                        | 2.554, 2.557   | 0.030       | +0.133                | -0.032   | 0.224      |
| Ag45...H25                                                      | 2.751, 2.780   | 0.008       | +0.026                | -0.005   | 0.025      |
| Ag58...H34                                                      | 3.222, 3.303   | 0.005       | +0.011                | -0.002   | 0.027      |
| Ag47...N18                                                      | 3.706, 3.713   | 0.004       | +0.011                | -0.002   | 0.028      |

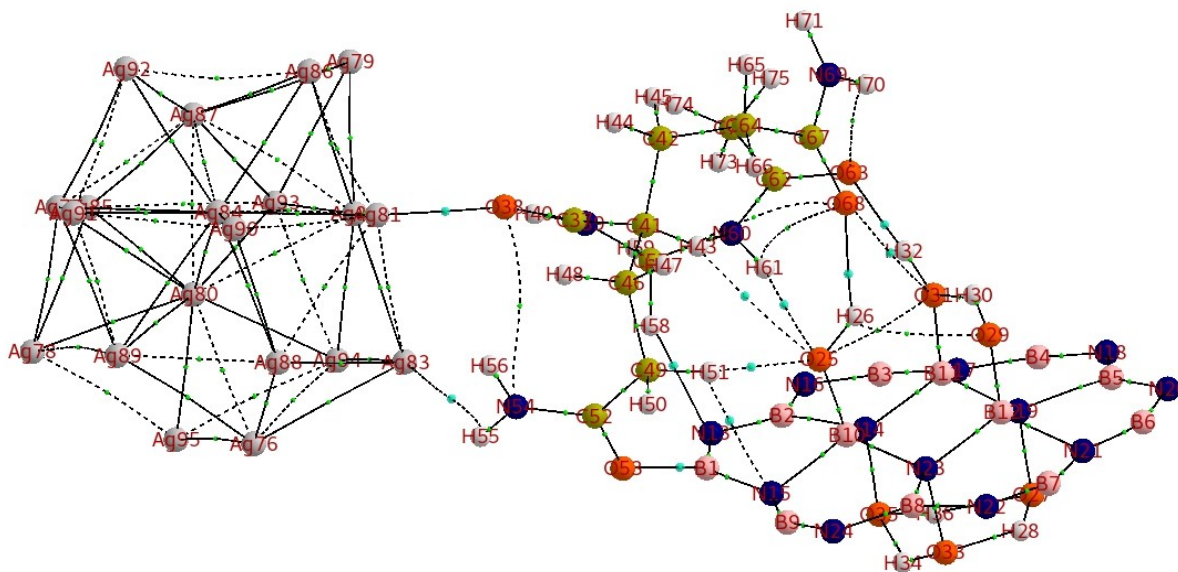

Figure S8. QTAIM-based Molecular Graph for the PAM-Ag-BNOH Composite Model

Table S5. Some Important and Selected QTAIM-based Topological Parameters [ $\rho$ ,  $\nabla^2(\rho)$ ,  $V$ , DI (A, B)] of the PAM-Ag-BNOH Composite Model

| Bond                                                               | BL, BPL (in Å)              | $\rho$ (au) | $\nabla^2(\rho)$ (au) | $V$ (au) | DI (A, B) |
|--------------------------------------------------------------------|-----------------------------|-------------|-----------------------|----------|-----------|
| MNI (Intermolecular) Between the PAM and Ag Units                  |                             |             |                       |          |           |
| Ag81-O38                                                           | 2.398, 2.401                | 0.040       | +0.205                | -0.049   | 0.290     |
| Ag83...H55                                                         | 3.168, 3.240                | 0.005       | +0.012                | -0.002   | 0.020     |
| Covalent Bond (Intermolecular) Between the PAM and BNOH Components |                             |             |                       |          |           |
| B1-O53                                                             | 1.558, 1.562                | 0.109       | +0.422                | -0.217   | 0.315     |
| NCI (Intermolecular) Between the PAM and BNOH Components           |                             |             |                       |          |           |
| Bond                                                               | HBD, BPL (in Å), bond angle | $\rho$ (au) | $\nabla^2(\rho)$ (au) | $V$ (au) | DI (A, B) |
| O31-H32...O63                                                      | 1.722, 1.750, 174.3°        | 0.043       | +0.143                | -0.038   | 0.113     |
| O25-H26...O68                                                      | 1.912, 1.978, 136.4°        | 0.025       | +0.104                | -0.024   | 0.052     |

|                                                     |                      |             |                       |          |           |
|-----------------------------------------------------|----------------------|-------------|-----------------------|----------|-----------|
| C49-H51...O25                                       | 2.079, 2.097, 170°   | 0.023       | +0.071                | -0.019   | 0.073     |
| C41-H43...O25                                       | 2.787, 2.810, 144.4° | 0.005       | +0.021                | -0.003   | 0.015     |
| C57-H58...N13                                       | 2.079, 2.099, 151.3° | 0.026       | +0.075                | -0.018   | 0.107     |
| C49-H51...N15                                       | 2.594, 2.625, 124.1° | 0.010       | +0.040                | -0.007   | 0.023     |
| N60-H61...O25                                       | 2.500, 2.526, 168.9  | 0.008       | +0.031                | -0.006   | 0.027     |
| NBP (Intermolecular) Between the PAM and BNOH Units |                      |             |                       |          |           |
| Bond Path                                           | BL, BPL (in Å)       | $\rho$ (au) | $\nabla^2(\rho)$ (au) | $V$ (au) | DI (A, B) |
| O31 - O68                                           | 3.142, 3.154         | 0.006       | +0.025                | -0.005   | 0.024     |

## Section S2. NCI-Plot: 2D Scatter Plot and 3D Isosurface Map

A full description about the NCI-plot can be seen in the literature in understanding and plotting of the NCIs in a better way [Contreras-García, J.; Johnson, E. R.; Keinan, S.; Chaudret, R.; Piquemal, J. P.; Beratan, D.N.; Yang, W. NCIPLOT: A Program for Plotting Noncovalent Interaction Regions. *J. Chem. Theory Comput.* **2011**, *7* (3), 625–632; Johnson, E. R.; Keinan, S.; Mori-Sánchez, P.; Contreras-García, J.; Cohen, A. J.; Yang, W. Revealing Noncovalent Interactions. *J. Am. Chem. Soc.* **2010**, *132* (18), 6498–6506]. As reported by Yang *et al* [Johnson, E. R.; Keinan, S.; Mori-Sánchez, P.; Contreras-García, J.; Cohen, A. J.; Yang, W. Revealing Noncovalent Interactions. *J. Am. Chem. Soc.* **2010**, *132* (18), 6498–6506], deep insights into the electron density and its derivatives-based method can be viewed the published work as cited above. A detailed evaluation of the NCI-plot on a few bio-composite materials can be seen in literature [Bio-composites taken as the PAM-TiO<sub>2</sub>, PAM-CNT, PAM-TiO<sub>2</sub>-CNT - S. Awasthi, J. Gaur, S. K. Pandey, M. S. Bobji, and C. Srivastava, High Strength, Strongly Bonded Nanocomposite Hydrogels for Cartilage Repair *ACS App. Mat. Int.* **13**, (2021), 24505-24523; Bio-composites takes as the HAP-BN, HAP-CNT, and HAP-GrO - S. Awasthi, J. Gaur, S. K. Pandey, and C. Srivastava, Load-bearing study and interfacial interactions of hydroxyapatite composite coatings for bone tissue engineering, *Mater. Chem. Front.* **6**, (2022), 3731-3747] and references therein.

**Hints:** The RDG isosurface displayed on horizontal axis is 0.5 (ranging from -0.05 to +0.05). The  $\Omega(r)$  values ranging from -0.035 atomic unit (au) to +0.02 au on vertical axis (Figure 10, right) show the color surfaces of the species on a blue-green-red scale. The detailed description of the NCI tool clarifies that the higher density values ( $\Omega(r) < 0$ ) show the stronger attractive interactions while the very low-density values ( $\Omega(r) > 0$ ) indicate the repulsive interactions. Moreover, blue color spike in the scatter map two-dimensional (2D) plot and blue color disc-shaped NCI isosurface three-dimensional

(3D) representation showing the attractive (stabilizing) interaction. The green color spikes in the 2D scatter plot and green color disc-shaped NCI 3D isosurface demonstrating a variety of vdW interactions. The presence of steric effect is evidently shown by the low-gradient spikes appearing at positive side. This effect as shown by the red ellipsoid depicts the electron density depletion which is because of the electrostatic repulsion.
